# Supplementary material
Source: PubMed Central journal article supplement (PMC7744430)
Supplement: NIHMS1644219-supplement-1.pdf [file NIHMS1644219-supplement-1.pdf]

**Supplementary Table S1: Antibodies used in this study**

| <b>Antibody</b>             | <b>Source</b>  | <b>Cat No.</b> | <b>Dilution</b> | <b>Application</b> |
|-----------------------------|----------------|----------------|-----------------|--------------------|
| anti-Beta Actin             | Santa Cruz     | sc-47778       | 1:5000          | IB                 |
| anti-Gcn5                   | Cell Signaling | 3305S          | 1:1000          | IB                 |
| Anti-Gapdh                  | Millipore      | MAB374         | 1:5000          | IB                 |
| anti-Mouse                  | GE Healthcare  | NA931V         | 1:20000         | IB (Secondary)     |
| anti-Rabbit                 | GE Healthcare  | NA934V         | 1:20000         | IB (Secondary)     |
| anti-B220-APC-Cy7           | Biolegend      | 103223         | 1:200           | FC                 |
| anti-B220-Biotinylated      | Biolegend      | 103203         | 1:1000          | FC                 |
| anti-CD3-BV605              | Biolegend      | 100237         | 1:100           | FC                 |
| anti-CD11b-BV605            | Biolegend      | 101237         | 1:100           | FC                 |
| anti-CD19-APC               | Invitrogen     | 50-113-8190    | 1:1000          | FC                 |
| anti-CD19-PE-Cy7            | BD Biosciences | BD561739       | 1:200           | FC                 |
| anti-CD21-APC               | BD Biosciences | BD561770       | 1:200           | FC                 |
| anti-CD23-FITC              | BD Biosciences | BD561772       | 1:200           | FC                 |
| Anti-CD43-Alexa fluor       | BD Biosciences | BDB561856      | 1:2000          | FC                 |
| anti-CD95-PE                | BD Biosciences | BDB554258      | 1:1000          | FC                 |
| anti-GL7-FITC               | BD Biosciences | BDB562080      | 1:0000          | FC                 |
| anti-IgD-Alexa flour<br>700 | Biolegend      | 405729         | 1:1000          | FC                 |
| anti-IgD-PE                 | BD Biosciences | BDB558597      | 1:100           | FC                 |
| anti-IgM-Alexa fluor<br>647 | Biolegend      | 406525         | 1:100           | FC                 |
| anti-IgM-APC-Cy7            | Biolegend      | 406515         | 1:4000          | FC                 |
| PE-Streptavidin             | Biolegend      | 405203         | 1:4000          | FC (Secondary)     |

**Supplementary Table S2: Primers used in this study**

| <b>Oligo name</b> | <b>Sequence</b>         | <b>Source</b>       |
|-------------------|-------------------------|---------------------|
| mBlimp-1 Fwd      | TTCTCTTGGA AAAACGTGTGGG | 1                   |
| mBlimp-1 Rev      | GGAGCCGGAGCTAGACTTG     | 1                   |
| mCcmd1 Fwd        | GCAAGCATGCACAGACCTT     | 2                   |
| mCcmd1 Rev        | GTTGTGCGGTAGCAGGAGA     | 2                   |
| mCcne2 Fwd        | GTGCATTCTAGCCATCGACTCTT | Originally designed |
| mCcne2 Rev        | AGGCACCATCCAGTCTACACATT | Originally designed |
| mChek1 Fwd        | CGTTACTGAACAAGATGTGG    | Originally designed |
| mChek1 Rev        | TTATGAAGCAAAGCCAGAGGAG  | Originally designed |
| mE2F1 Fwd         | TGGATCTGGAGACTGACCAT    | Originally designed |
| mE2F1 Rev         | AGTTGCAGCTGTGTGGTACA    | Originally designed |
| mGapdh Fwd        | TGTGTCCGTCGTGGATCTGA    | Originally designed |
| mGapdh Rev        | TTGCTGTTGAAGTCGCAGGA    | Originally designed |

|           |                           |                     |
|-----------|---------------------------|---------------------|
| mGcn5 Fwd | CTTCTGTGCCGTCACCTCAA      | Originally designed |
| mGcn5 Rev | TGGTACTCCTTTAGGTGGTTCATCA | Originally designed |
| mIRF4 Fwd | CCCCATTGAGCCAAGCATAA      | 3                   |
| mIRF4 Rev | GCAGCCGGCAGTCTGAGA        | 3                   |

### Supplementary Table S3: DAVID GO terms of significantly altered pathways

| GO ID      | GO Name                                                              | # of molecules | P-value |
|------------|----------------------------------------------------------------------|----------------|---------|
| GO:0006974 | Cellular Response to DNA Damage Stimulus                             | 30             | 2.8E-10 |
| GO:0007049 | Cell cycle                                                           | 35             | 2.6E-09 |
| GO:0006355 | Regulation of Transcription                                          | 76             | 2.3E-08 |
| GO:0006351 | Transcription, DNA-templated                                         | 66             | 4.6E-08 |
| GO:0006281 | DNA repair                                                           | 22             | 1.9E-07 |
| GO:0006397 | mRNA processing                                                      | 22             | 2.3E-07 |
| GO:0008380 | RNA splicing                                                         | 19             | 2.4E-07 |
| GO:0000183 | Chromatin Silencing at rDNA                                          | 10             | 4.0E-07 |
| GO:0000122 | Negative Regulation of transcription from RNA Polymerase II promoter | 33             | 1.5E-06 |
| GO:0051301 | Cell Division                                                        | 22             | 2.6E-06 |

### Supplementary Table S4: Egfr Pathway downregulated genes

| Genes in dataset | Prediction (based on measurement direction) | Expr Log Ratio |
|------------------|---------------------------------------------|----------------|
| AKT1             | Inhibited                                   | -0.447         |
| TOP1             | Activated                                   | -0.458         |
| LYAR             | Inhibited                                   | -0.467         |
| RANBP1           | Inhibited                                   | -0.482         |
| NUDC             | Inhibited                                   | -0.5           |
| HNRNPA2B1        | Inhibited                                   | -0.5           |
| HNRNPD           | Inhibited                                   | -0.529         |
| SDF2L1           | Inhibited                                   | -0.538         |
| SRSF1            | Inhibited                                   | -0.63          |
| E2F2             | Inhibited                                   | -0.659         |

|         |           |        |
|---------|-----------|--------|
| PABPC1  | Inhibited | -0.659 |
| ZEB2    | Inhibited | -0.674 |
| HMGA1   | Inhibited | -0.677 |
| E2F1    | Inhibited | -0.687 |
| CBX5    | Inhibited | -0.703 |
| HIRA    | Inhibited | -0.733 |
| HSP90B1 | Inhibited | -0.838 |
| UBE2S   | Inhibited | -0.864 |
| WEE1    | Inhibited | -0.893 |
| ACOT7   | Inhibited | -0.91  |
| SKP2    | Inhibited | -1.05  |
| BCL2L1  | Inhibited | -1.371 |
| CCND1   | Inhibited | -1.403 |
| IQGAP2  | Inhibited | -1.63  |
| VEGFA   | Inhibited | -2.233 |
| EPHA2   | Inhibited | -2.686 |
| INSM1   | Inhibited | -3.897 |

**Supplementary Table S5: Hgf pathway downregulated genes**

| Genes in dataset | Prediction (based on measurement direction) | Expr Log Ratio |
|------------------|---------------------------------------------|----------------|
| LDHA             | Affected                                    | -0.413         |
| SLC9A3R1         | Affected                                    | -0.433         |
| AKT1             | Inhibited                                   | -0.447         |
| PGAM1            | Affected                                    | -0.505         |
| HDGF             | Inhibited                                   | -0.531         |
| YWHAH            | Affected                                    | -0.567         |
| DYNLL1           | Affected                                    | -0.583         |
| CDC25A           | Inhibited                                   | -0.59          |
| CDC25B           | Inhibited                                   | -0.705         |
| DBF4             | Inhibited                                   | -0.81          |
| SMC2             | Inhibited                                   | -0.899         |
| KIF20B           | Inhibited                                   | -0.908         |
| MAD2L1           | Inhibited                                   | -0.972         |
| PLK4             | Inhibited                                   | -0.975         |
| SKP2             | Inhibited                                   | -1.05          |
| AKAP12           | Inhibited                                   | -1.229         |
| CD93             | Inhibited                                   | -1.249         |
| HLX              | Inhibited                                   | -1.272         |
| FOXM1            | Inhibited                                   | -1.339         |
| CDKN2C           | Inhibited                                   | -1.346         |
| BCL2L1           | Inhibited                                   | -1.371         |
| CCND1            | Inhibited                                   | -1.403         |
| CENPF            | Inhibited                                   | -1.454         |

|       |           |        |
|-------|-----------|--------|
| CCNE2 | Inhibited | -1.581 |
| VEGFA | Inhibited | -2.233 |
| THBD  | Inhibited | -2.467 |

**Supplementary Table S6: Vegf Pathway downregulated genes**

| Genes in dataset | Prediction (based on measurement direction) | Expr Log Ratio |
|------------------|---------------------------------------------|----------------|
| CASP3            | Activated                                   | -0.511         |
| CDC25A           | Inhibited                                   | -0.59          |
| MAZ              | Inhibited                                   | -0.634         |
| CDC25B           | Inhibited                                   | -0.705         |
| DBF4             | Inhibited                                   | -0.81          |
| SMC2             | Inhibited                                   | -0.899         |
| KIF20B           | Inhibited                                   | -0.908         |
| MAD2L1           | Inhibited                                   | -0.972         |
| PLK4             | Inhibited                                   | -0.975         |
| SKP2             | Inhibited                                   | -1.05          |
| AKAP12           | Inhibited                                   | -1.229         |
| CD93             | Inhibited                                   | -1.249         |
| FOXM1            | Inhibited                                   | -1.339         |
| CDKN2C           | Inhibited                                   | -1.346         |
| CENPF            | Inhibited                                   | -1.454         |
| CCNE2            | Inhibited                                   | -1.581         |
| VEGFA            | Inhibited                                   | -2.233         |
| THBD             | Inhibited                                   | -2.467         |

1. Mackay LK, *et al.* Hobit and Blimp1 instruct a universal transcriptional program of tissue residency in lymphocytes. *Science* **352**, 459-463 (2016).
2. Wang R, *et al.* Notch1 promotes mouse spinal neural stem and progenitor cells proliferation via p-p38-pax6 induced cyclin D1 activation. *Exp Cell Res* **373**, 80-90 (2018).
3. Yashiro T, Yamaguchi M, Watanuki Y, Kasakura K, Nishiyama C. The Transcription Factors PU.1 and IRF4 Determine Dendritic Cell-Specific Expression of RALDH2. *J Immunol* **201**, 3677-3682 (2018).
